# Supplementary material for: Retinoic Acid-Mediated Control of Energy Metabolism Is Essential for Lung Branching Morphogenesis
Source: MDPI journal article supplement (doi:10.3390/ijms25095054), 2024-05-06
Supplement: s1 [file s1]

## Supplementary Materials

**Figure S1**

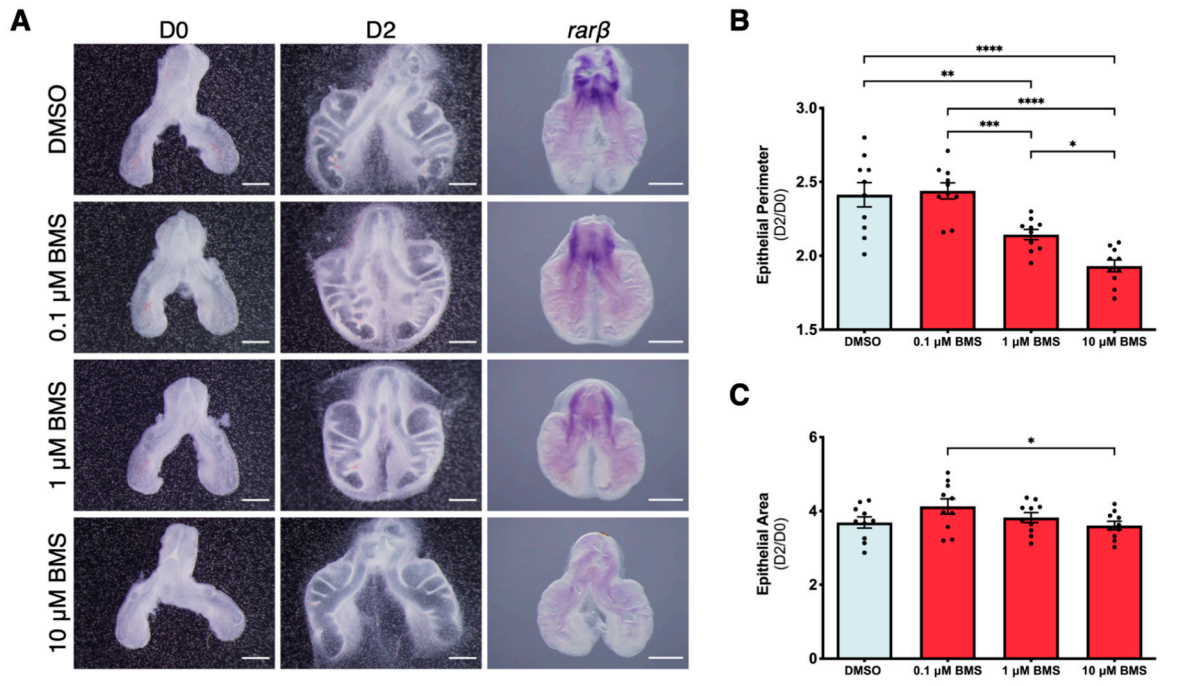

**Figure S1. Dose-dependent effect of BMS treatment on RA signaling pathway and lung branching morphogenesis.** (A) Representative examples of b2 lung explant culture at D0 (0 hours) and D2 (48 hours), treated with DMSO, 0.1 μM of BMS, 1 μM of BMS, and 10 μM of BMS; D2 lungs were probed for *rarβ*, a recognized target of the RA signaling pathway;  $n = 5/\text{condition}$ . scale bar: 500 μm. There is a dose-dependent decrease in *rarβ* expression, suggesting a gradual downregulation of the RA signaling pathway. Morphometric analysis of lung explants: (B) epithelial perimeter and (C) epithelial area. Results are expressed as D2/D0 ratio and represented as mean  $\pm$  SEM ( $n = 10/\text{condition}$ ). One-Way ANOVA and Fisher's LSD test were performed. Significantly different results are indicated as:  $*p < 0.05$ ;  $**p < 0.01$ ;  $***p < 0.001$ ;  $****p < 0.0001$ . There is a progressive decrease in the epithelial perimeter, and no major alterations were detected in the epithelial area.

**Figure S2**

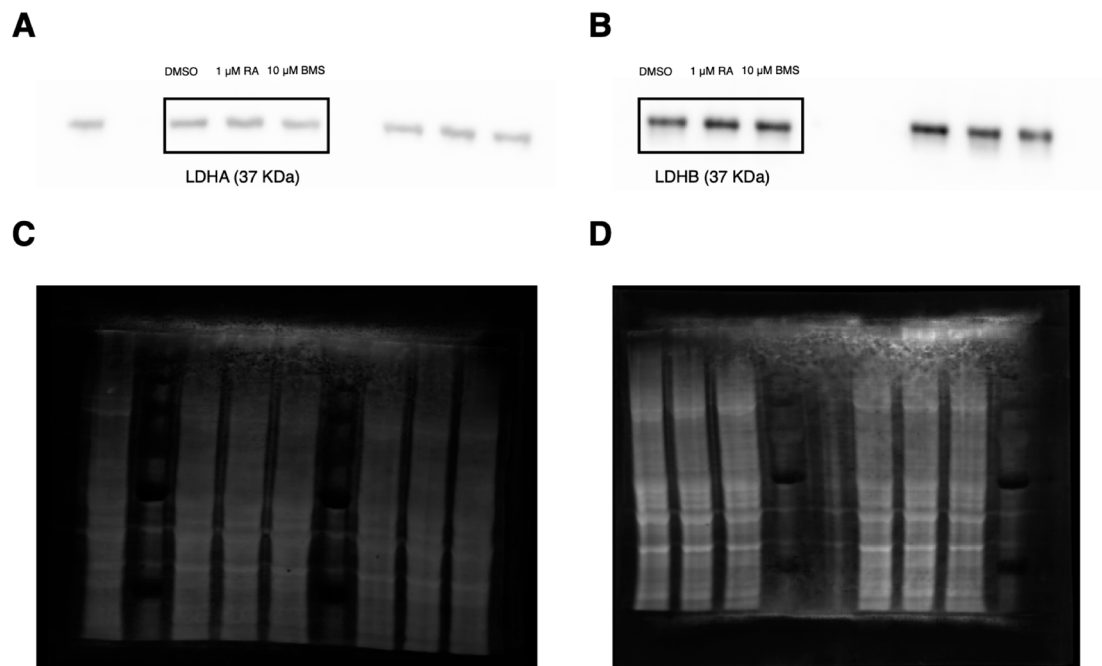

**Figure S2. LDHA and LDHB full-length blots and total protein. (A)** LDHA immunoblot (37 KDa). **(B)** LDHB immunoblot (37 KDa). **(C)** LDHA membrane total protein staining. **(D)** LDHB membrane total protein staining. Quantitative fluorescent total protein stain was performed using AzureRed technology.

**Figure S3**

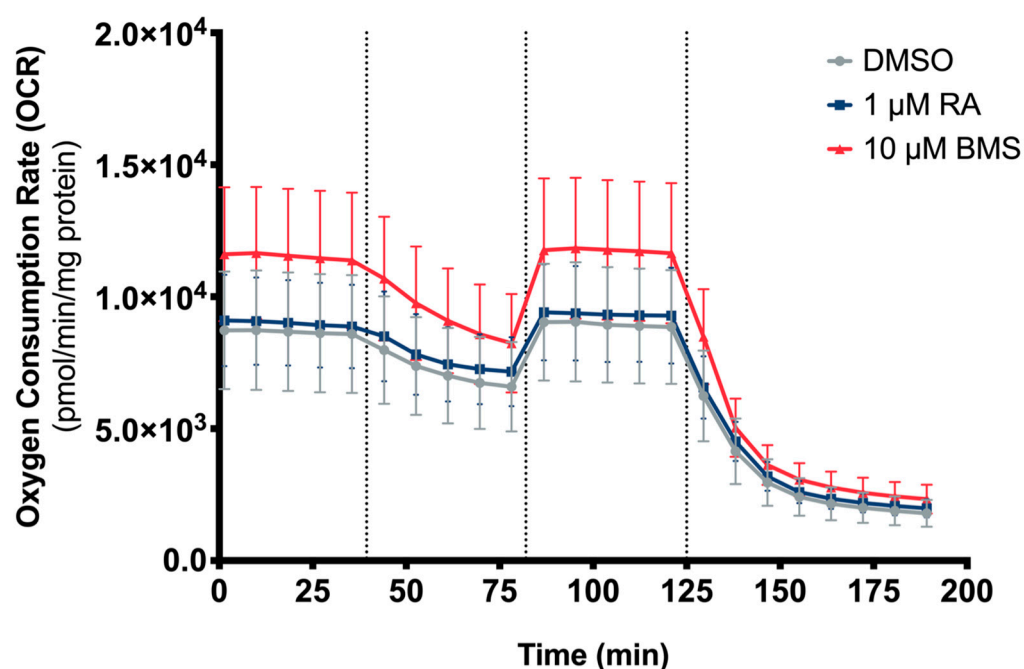

**Figure S3. Seahorse OCR profile.** Real-time measurement of oxygen consumption rate (OCR) of D2 lung explants exposed to DMSO, 1  $\mu$ M of RA, and 10  $\mu$ M of BMS. Time of measurements and moment of injections: 1<sup>st</sup> injection composed of Oligomycin (inhibition of complex V), 2<sup>nd</sup> injection composed of FCCP (mitochondrial oxidative phosphorylation uncoupler), and 3<sup>rd</sup> injection composed of Rotenone and Antimycin A (inhibition of complex I and III, respectively). Results are represented in pmol/min/mg protein. Results are expressed as mean  $\pm$  SEM ( $n \geq 13$ /condition).

**Figure S4**

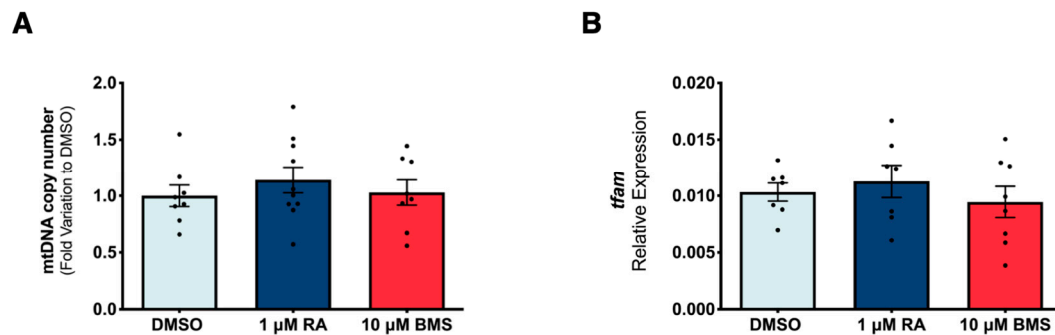

**Figure S4. Mitochondrial biogenesis in lung branching morphogenesis.** Mitochondrial biogenesis analysis of lung explants after 48 hours in culture supplemented with DMSO, 1 μM of RA, and 10 μM of BMS. **(A)** mtDNA copy number ( $n \geq 8$ /condition). Results are represented in fold variation to DMSO. **(B)** *tfam* relative expression levels ( $n \geq 7$ /condition). Results are expressed as mean  $\pm$  SEM. One-Way ANOVA and Fisher's LSD test were performed. No significantly different results.

**Figure S5**

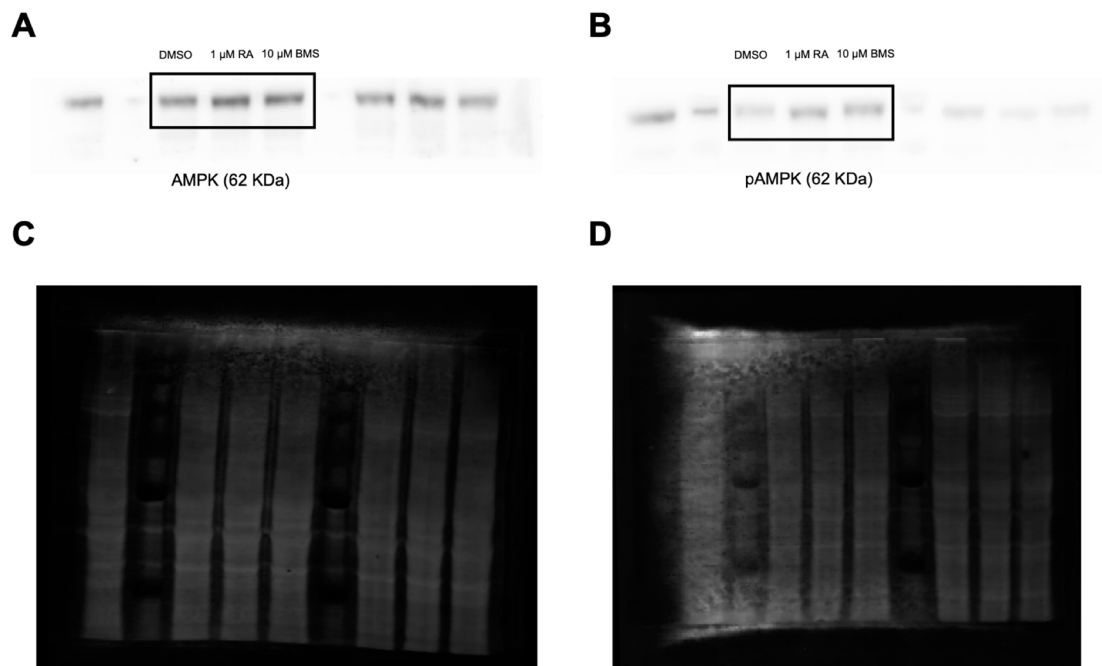

**Figure S5. AMPK and pAMPK full-length blots and total protein. (A)** AMPK immunoblot (62 KDa). **(B)** pAMPK immunoblot (62 KDa). **(C)** AMPK membrane total protein staining. **(D)** pAMPK total protein staining. Quantitative fluorescent total protein stain was performed using AzureRed technology.

**Table S1**

**Table S1. Primers and qPCR conditions.** Primer sequences forward (Fw) and reverse (Rv), corresponding PCR product size, annealing temperature and the number of cycles.

| Gene           | Sequence 5'-3'                                               | Size (bp) | Annealing T (°C) | Cycles |
|----------------|--------------------------------------------------------------|-----------|------------------|--------|
| <i>actin-β</i> | Fw - CTTCTAAACCGGACTGTTACCA<br>Rv - AAACAAATAAAGCCATGCCAATCT | 100       | 58               | 30     |
| <i>18s</i>     | Fw - TCTTTCTCGATTCCGTGGGT<br>Rv - AACGCCACTTGTCCCTCTAC       | 157       | 58               | 30     |
| <i>pfk1</i>    | Fw - CGTGGGAGGAGCTTTGAGAA<br>Rv - CAGCCACCTCACGTATCTG        | 236       | 56               | 40     |
| <i>g6pd</i>    | Fw - CTGGGGCAGTACGTGGGTAA<br>Rv - CCGAAATATCGCCCGGAACC       | 232       | 62               | 40     |
| <i>pgd</i>     | Fw - AATAAATTAGTGCCGTTGTTGGA<br>Rv - TGGCATGAGTGAAGGACCAT    | 174       | 60               | 40     |
| <i>tfam</i>    | Fw - GGAGAAAACGGCTGGCAAAA<br>Rv - AGCTGAAGGTATGGCTGCTT       | 211       | 60               | 40     |
| <i>srebfl</i>  | Fw - GCTCTCGGCTTCGACGAT<br>Rv - CGAACAGCCCTGAGAAGTCAT        | 145       | 60               | 40     |
| <i>fasn</i>    | Fw - CGGATCTCTCCCACTCTGGA<br>Rv - CCGTGCAATGCCATCTTAGC       | 143       | 60               | 40     |
| <i>cpt1</i>    | Fw - TCATTGCGGGGAAAACCTC<br>Rv - CCCACGGCCTTTATTGCTC         | 158       | 64               | 40     |
| <i>nd1</i>     | Fw - TGTAGAATATGCCGCCGGAC<br>Rv - GTCATAGCGGAACCGTGGAT       | 214       | 62               | 40     |
| <i>agrt1</i>   | Fw -TGGCCATAGTGCATCCAGTG<br>Rv - ACGATGAATGATGACGGGCA        | 119       | 62               | 40     |
